# Supplementary material for: Human Ribosomal RNA-Derived Resident MicroRNAs as the Transmitter of Information upon the Cytoplasmic Cancer Stress
Source: PubMed Central journal article supplement (PMC4969525; doi:10.1155/2016/7562085), 2016-07-19

|              | RNA45S (NR_046235.1) |       |        | rDNA-repeating unit (U13369.1) |       |        |
|--------------|----------------------|-------|--------|--------------------------------|-------|--------|
|              | Start                | End   | Length | Start                          | End   | Length |
| 5' ETS       | 1                    | 3654  | 3654   | 1                              | 3656  | 3656   |
| 18S          | 3655                 | 5523  | 1869   | 3657                           | 5527  | 1871   |
| ITS1         | 5524                 | 6601  | 1078   | 5528                           | 6623  | 1096   |
| 5.8S         | 6602                 | 6757  | 156    | 6624                           | 6779  | 156    |
| ITS2         | 6758                 | 7924  | 1167   | 6780                           | 7934  | 1155   |
| 28S          | 7925                 | 12994 | 5070   | 7935                           | 12969 | 5035   |
| 3' ETS       | 12995                | 13357 | 363    | 12970                          | 13314 | 345    |
| NTS          | -                    | -     | -      | 13315                          | 42999 | 29685  |
| Total length | <b>13357</b>         |       |        | <b>42999</b>                   |       |        |

**Supplemental Table 1. Comparison between two rRNA gene sequence data.**

Two rRNA gene data showed differences in its length and moderate amount of insertion (or deletion) and substitutions.

| <b>rmiR</b>                                    | <b>miR-1268</b> | <b>miR-6724</b> | <b>miR-3656</b> | <b>miR-4466</b> | <b>miR-6087</b> |
|------------------------------------------------|-----------------|-----------------|-----------------|-----------------|-----------------|
| <b>DNS</b>                                     | 196             | 196             | 169             | 169             | 169             |
| <b>TOP10<br/>Target Genes<br/>(TargetScan)</b> | MUC2            | AL627309.1      | CLCN6           | NNAT            | CXXC11          |
|                                                | SLC8A2          | BOK             | ADAMTS17        | ICAM3           | RHOG            |
|                                                | EHD2            | PPP2R4          | THRA            | CAMK2B          | TAPBP           |
|                                                | LGI3            | HMGA1           | DBNDD1          | FBXL16          | FGFRL1          |
|                                                | HOGA1           | SUMF2           | BARX1           | GRAMD1A         | OTP             |
|                                                | AL627309.1      | CD6             | RANBP3          | LTBP4           | CTF1            |
|                                                | RASD2           | CHTF8           | RAB20           | MT-ND5          | PRRT1           |
|                                                | EGR4            | FGFBP2          | C19orf77        | PHLDA1          | C15orf37        |
|                                                | ADAMTS4         | ANG             | TOR4A           | CDKN2A          | ZNF726          |
|                                                | SCGB1A1         | GNG12           | BLOC1S1         | G6PC3           | KHDC3L          |
| <b>TOP10<br/>Target Genes<br/>(miRTarBase)</b> | QSOX2           | MTFMT           | MRPL12          | NAGK            | PSMG1           |
|                                                | AIP             | SUMF2           | LSP1            | NFX1            | HAVCR1          |
|                                                | WWP2            | ADAMTS13        | MNT             | F2R             | TANGO2          |
|                                                | BARX1           | VPS37B          | PRDM2           | DDA1            | ZNF394          |
|                                                | SGPL1           | SP2             | ZNF770          | REXO1           | KBTBD12         |
|                                                | POLR2I          | PPP6R1          | CECR1           | KMT2D           | CECR1           |
|                                                | FASN            | COPS7B          | TBC1D19         | AACS            | CCDC125         |
|                                                | SOX12           | ISL2            | NUP43           | MICAL2          | MYADM           |
|                                                | CAMK2G          | SOX12           | ATG9A           | GGA2            | NMNAT1          |
|                                                | MAPK1           | VPS51           | RASL10B         | MINOS1          | HECTD3          |

**Supplemental Table 2. Top 10 target genes of rmiRNAs.**

Predicted targets were collected from TargetScan and experimentally validated targets were collected from miRTarBase.

|              | miRNA name      | sequences                | folding energy (-Kcal/mol) | leftmost position of predicted target site | p-value  |
|--------------|-----------------|--------------------------|----------------------------|--------------------------------------------|----------|
| <b>Alu</b>   | hsa-miR-4492    | GGTGA AACCCCGTCTC        | -15.3                      | 99                                         | 0.0207   |
|              | hsa-miR-663b    | GCAGTGAGCCGAGATCGGCCACT  | -12.5                      | 220                                        | 0.0774   |
|              | hsa-miR-4466    | TCGCGCCACTGCACTC         | -20.9                      | 234                                        | 0.0774   |
|              | hsa-miR-4492    | AGAGCGAGACTCCGTCTC       | -12.3                      | 263                                        | 0.111    |
|              | hsa-miR-6087    | GAGCGAGACTCCGTCTCA       | -19.2                      | 264                                        | 0.111    |
|              |                 |                          |                            |                                            |          |
| <b>AluJo</b> | hsa-miR-4488    | AGCGAGACCCCGTCTCTA       | -17.9                      | 99                                         | 0.00592  |
|              | hsa-miR-4492    | ATAGCGAGACCCCGTCTC       | -15.2                      | 101                                        | 0.00592  |
|              | hsa-miR-6087    | GCGAGACCCCGTCTCT         | -20.3                      | 102                                        | 0.00592  |
|              | hsa-miR-6724-5p | GGTGGCGCGCGCCTGTAGTCCCAG | -25.4                      | 146                                        | 0.000525 |
|              | hsa-miR-663b    | AGTGAGCTATGATCGGCCACT    | -15.3                      | 224                                        | 0.0774   |
|              | hsa-miR-4466    | TCGCGCCACTGCACTC         | -20.9                      | 236                                        | 0.0774   |
|              | hsa-miR-663a    | GCGACAGAGCGAGACCCTGTCT   | -20.8                      | 260                                        | 0.29     |
|              | hsa-miR-6087    | GAGCGAGACCCGTCTCA        | -20                        | 266                                        | 0.29     |
|              |                 |                          |                            |                                            |          |
| <b>AluSc</b> | hsa-miR-6724-5p | GGTGGCGCGCGCCTGTAGTCCCAG | -25.4                      | 144                                        | 0.000525 |
|              | hsa-miR-3648    | TACTCGGGAGGCTGAGGCA      | -13.8                      | 169                                        | 0.363    |
|              | hsa-miR-4466    | TCGCGCCACTGCACTC         | -20.9                      | 234                                        | 0.0616   |
|              | hsa-miR-4492    | ACTGCACTCCAGCCTG         | -16.4                      | 241                                        | 0.0616   |
|              | hsa-miR-4508    | TGCACTCCAGCCTGGC         | -21.1                      | 243                                        | 0.0616   |
|              |                 |                          |                            |                                            |          |
| <b>AluSp</b> | hsa-miR-3648    | TACTCGGGAGGCTGAGGCA      | -13.8                      | 171                                        | 0.363    |
|              | hsa-miR-4466    | TCGCGCCATTGCACTC         | -16.6                      | 236                                        | 0.242    |
|              | hsa-miR-4492    | ATTGCACTCCAGCCTG         | -16.2                      | 243                                        | 0.242    |
|              | hsa-miR-4508    | TGCACTCCAGCCTGGG         | -17.7                      | 245                                        | 0.242    |
|              |                 |                          |                            |                                            |          |
| <b>AluSz</b> | hsa-miR-663a    | GGAGTTCGAGACCAGCCTGGCCA  | -16.5                      | 74                                         | 0.0207   |
|              | hsa-miR-4492    | GGTGA AACCCCGTCTC        | -15.3                      | 76                                         | 0.0207   |
|              | hsa-miR-4508    | AGTTCGAGACCAGCCTGGC      | -19.9                      | 101                                        | 0.0207   |
|              | hsa-miR-663a    | GCGCGCCTGTAATCCAGCTA     | -17.9                      | 152                                        | 0.0382   |
|              | hsa-miR-3648    | TACTCGGGAGGCTGAGGCA      | -13.8                      | 171                                        | 0.363    |
|              | hsa-miR-663b    | GCAGTGAGCCGAGATCGGCCACT  | -12.5                      | 222                                        | 0.0774   |
|              | hsa-miR-4466    | TCGCGCCACTGCACTC         | -20.9                      | 236                                        | 0.0774   |

|             |              |                          |       |     |         |
|-------------|--------------|--------------------------|-------|-----|---------|
|             |              |                          |       |     |         |
| <b>AluY</b> | hsa-miR-4492 | GGTGAAACCCCGTCTC         | -15.3 | 99  | 0.00566 |
|             | hsa-miR-663b | GCAGTGAGCCGAGATCGCGCCACT | -12.5 | 221 | 0.0774  |
|             | hsa-miR-4466 | TCGCGCCACTGCACTC         | -20.9 | 235 | 0.0774  |

**Supplemental Table 3. A list of predicted target sites of rmiRNA in Alu family.**

Sequence of Alu family is well conserved but number of targeting rmiRNAs and p-value are moderately differed among 6 Alu family.

Supplemental Figure 1

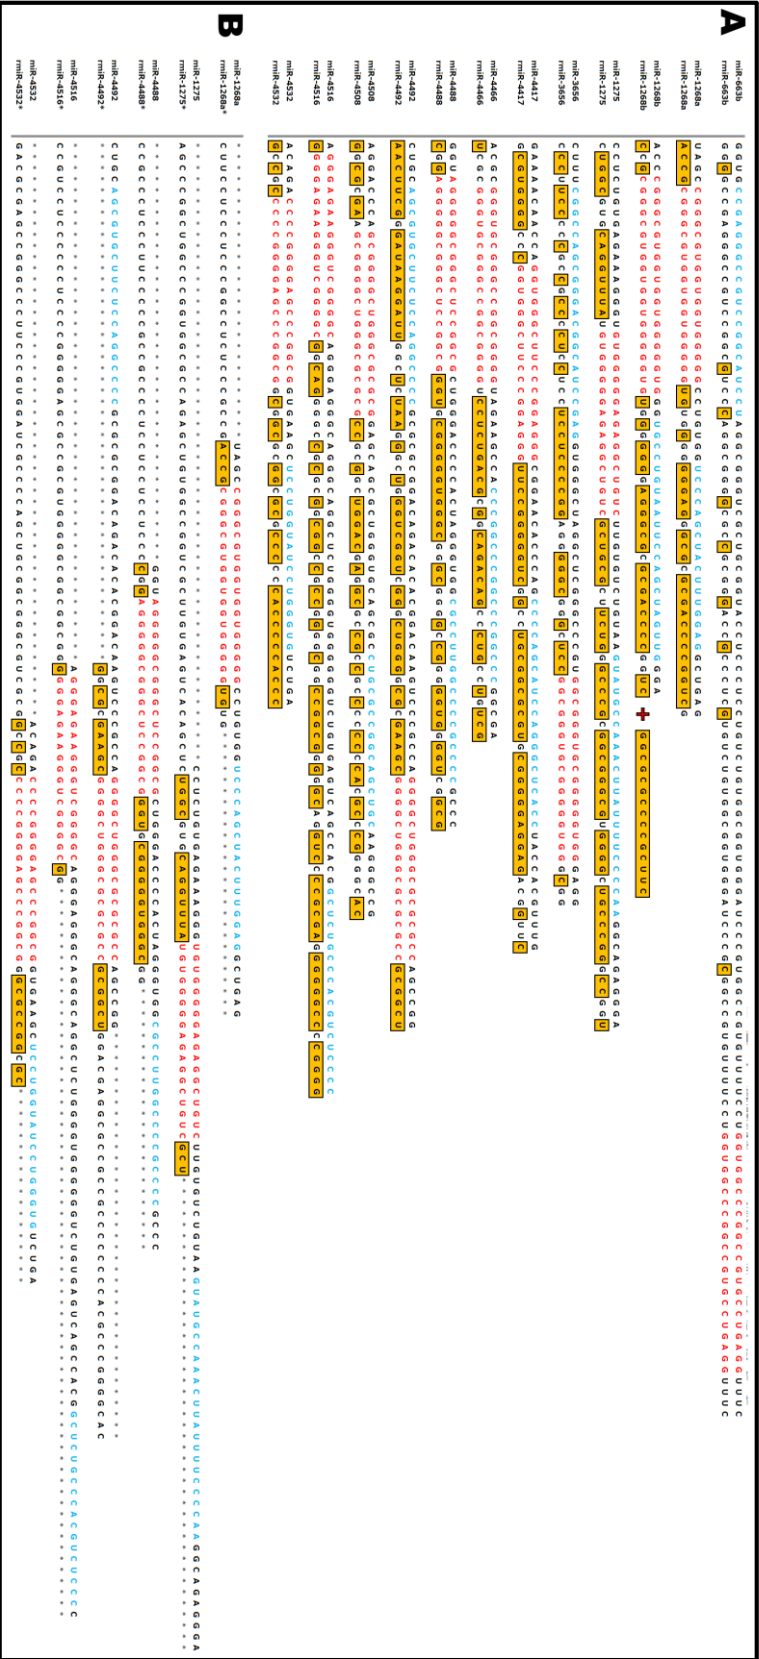

Supplemental Figure 2

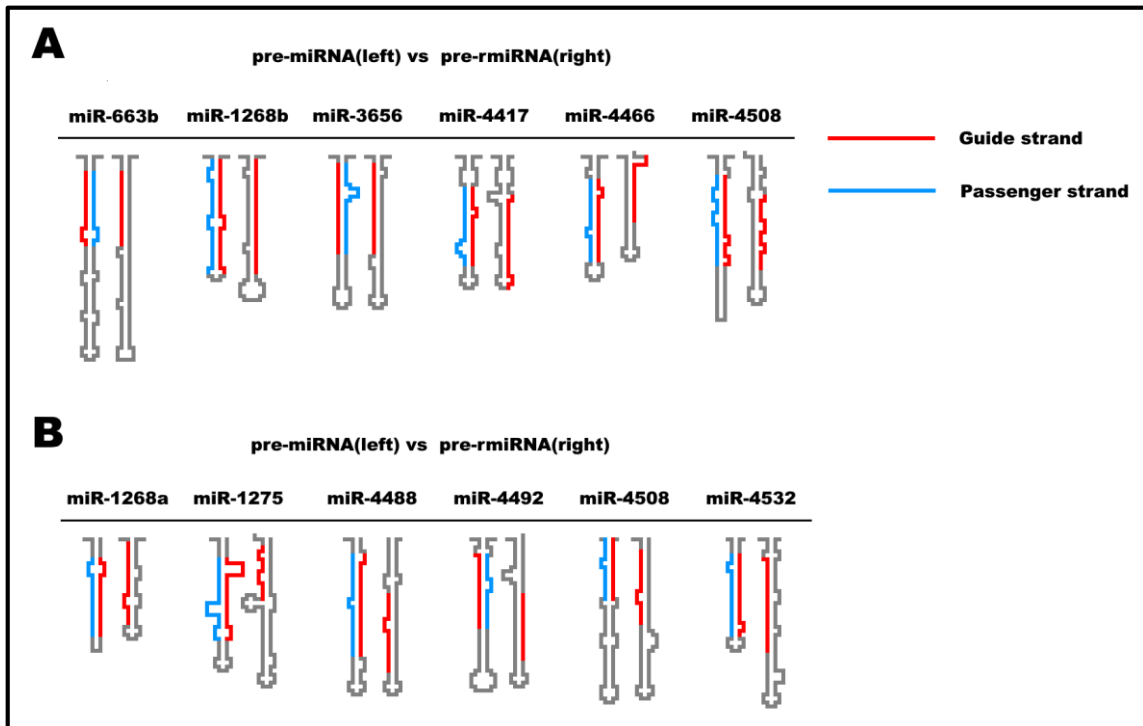

Supplemental Figure 3

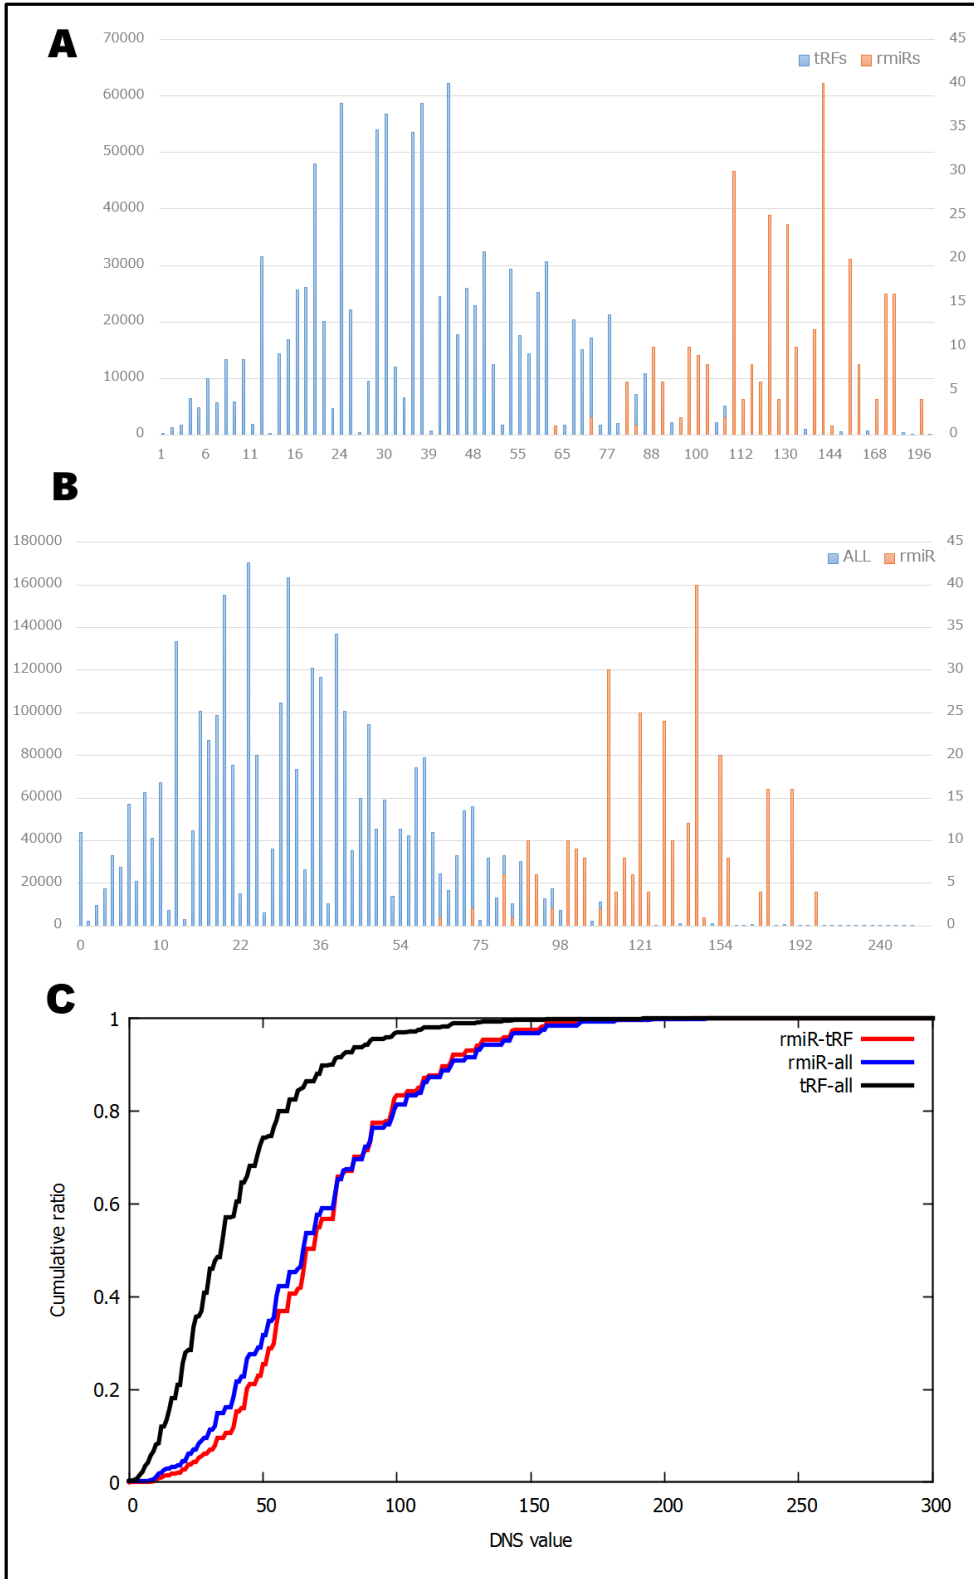

Supplemental Figure 4

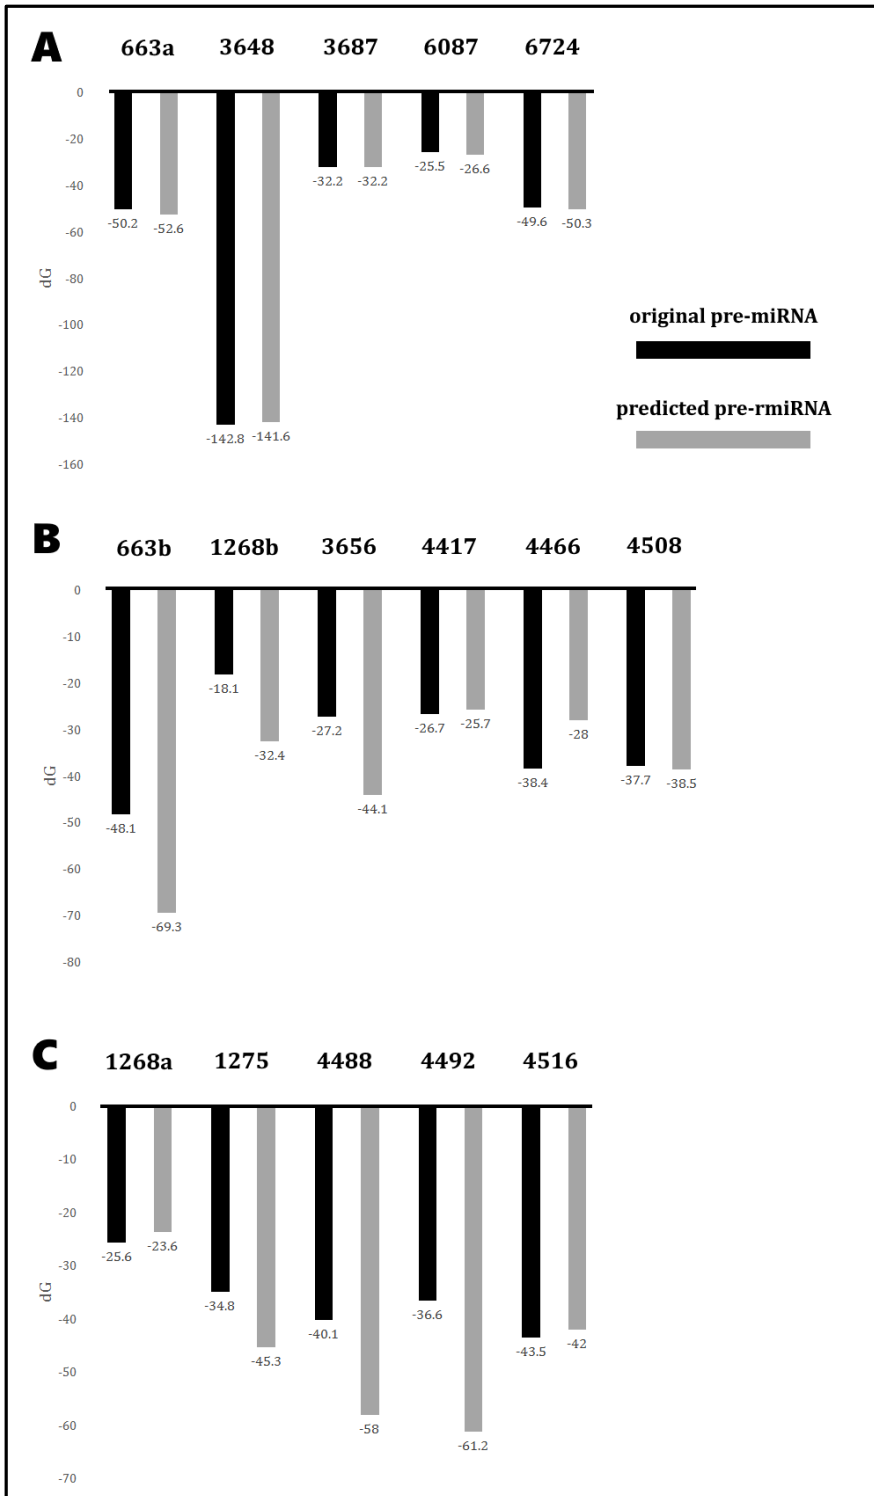

Supplement: 7562085.f1.pdf [file 7562085.f1.pdf]
